# Supplementary material for: Quality of life reporting in the management of posterior fossa tumours: A systematic review
Source: PubMed Central journal article supplement (PMC9594859; doi:10.3389/fsurg.2022.970889), 2022-09-29
Supplement: DataSheet2.pdf [file DataSheet2.pdf]

**Supplementary Table 1: Summary of Included Studies**

| Study            | Country     | Inclusion Criteria                                                                                                                    | Total Population Size | Quality of Life Measure     | Tumour Type           | QoL Timing        | Study Recruitment | Follow Up Period |
|------------------|-------------|---------------------------------------------------------------------------------------------------------------------------------------|-----------------------|-----------------------------|-----------------------|-------------------|-------------------|------------------|
| Pompili 2002(12) | Italy       | Patients who had undergone cerebellar astrocytoma surgery in the institution from 1970 to 1985                                        | 20                    | Self-Designed Questionnaire | Pilocytic Astrocytoma | Post-intervention | Retrospective     | 270              |
| Leong 2015(13)   | UK          | Patient members of the British Acoustic Neuroma Association                                                                           | 880                   | FaCE                        | Vestibular Schwannoma | NA                | Prospective       | NA               |
| Kessel 2017(14)  | Germany     | Patients who presented with VS to Department of Radiation Oncology at the Klinikum rechts der Isar, Munich, Germany from 2002 to 2015 | 184                   | Self-Designed Questionnaire | Vestibular Schwannoma | Post-intervention | Prospective       | 90               |
| Inoue 2001(15)   | Japan       | VS patients who underwent tumour removal between 1990 and 1997                                                                        | 236                   | Self-Designed Questionnaire | Vestibular Schwannoma | Post-intervention | Retrospective     | NA               |
| Browne 2008(16)  | New Zealand | All participants who had undergone VS surgery in the institution                                                                      | 85                    | SF-36                       | Vestibular Schwannoma | Post-intervention | Retrospective     | 83               |
| Bateman 2000(17) | UK          | Patients who had undergone acoustic neuroma surgery at the Queen's Medical Centre, Nottingham, UK                                     | 70                    | Self-Designed Questionnaire | Vestibular Schwannoma | Post-intervention | Retrospective     | NA               |

|                      |             |                                                                                                                                                                                                                                                 |     |                             |                                                                                                                                   |                   |               |    |
|----------------------|-------------|-------------------------------------------------------------------------------------------------------------------------------------------------------------------------------------------------------------------------------------------------|-----|-----------------------------|-----------------------------------------------------------------------------------------------------------------------------------|-------------------|---------------|----|
| Andersson 1997(18)   | Sweden      | VS patients operated on between 1988 and 1994                                                                                                                                                                                                   | 156 | Self-Designed Questionnaire | Vestibular Schwannoma                                                                                                             | Post-intervention | Retrospective | 40 |
| Acquaye 2017(19)     | USA         | Participants were invited to participate on the basis of the following criteria: 1) being diagnosed with an ependymoma or ependymoma variant; 2) being able to speak, write, and read English; and 3) being 18 years old or older               | 114 | SF-36                       | Ependymoma                                                                                                                        | Post-intervention | Prospective   | 6  |
| Sun 2015(20)         | China       | Patients who were diagnosed with VS and underwent microsurgery by an identical neurosurgeon with intraoperative electrophysiology monitoring                                                                                                    | 24  | SF-36                       | Vestibular Schwannoma                                                                                                             | Post-intervention | Retrospective | 24 |
| Subramaniam 2005(21) | Australia   | Patients who had undergone surgical treatment for tumours of the cerebellopontine angle between 1998 and 2001                                                                                                                                   | 55  | GBI                         | Vestibular Schwannoma                                                                                                             | NA                | Prospective   | NA |
| Fric 2011(22)        | Norway      | Patients who have undergone primary surgery for extrinsic posterior fossa lesions with significant ventral brainstem compression at the time of presentation, in whom either the pre-sigmoid or combined pre/retro-sigmoid approaches were used | 12  | SF-36                       | Trigeminal Schwannoma, Petroclival Meningeoma, Acoustic Schwannoma , Adenoid Cystic Carcinoma of Cavernous Sinus, Clivus Chordoma | Post-intervention | Retrospective | 24 |
| Blom 2020(23)        | Netherlands | VS patients with and without facial paresis                                                                                                                                                                                                     | 47  | SF-36 , PANQOL              | Vestibular Schwannoma                                                                                                             | NA                | Retrospective | NA |

|                     |              |                                                                                                                                                                                                                                                                      |     |                                      |                       |                   |               |    |
|---------------------|--------------|----------------------------------------------------------------------------------------------------------------------------------------------------------------------------------------------------------------------------------------------------------------------|-----|--------------------------------------|-----------------------|-------------------|---------------|----|
| McLaughlin 2015(24) | USA          | Aged 18 or older, diagnosis of VS, and adequate MRI imaging and audiometric data                                                                                                                                                                                     | 186 | PANQOL                               | Vestibular Schwannoma | Post-intervention | Retrospective | 31 |
| Link 2018(25)       | Norway + USA | Patients who had undergone micro- surgery for their VS, at least 18 yr old diagnosed with sporadic VS less than 3.0 cm in posterior fossa diameter between 1998 and 2008                                                                                             | 143 | SF- 36<br>PROMIS-10<br>GBI<br>PANQOL | Vestibular Schwannoma | Post-intervention | Retrospective | NA |
| Lodder 2018(26)     | UK           | British Acoustic Neuroma Association members who were on the association emailing list                                                                                                                                                                               | 880 | PANQOL                               | Vestibular Schwannoma | NA                | Retrospective | 84 |
| Wagner 2011(27)     | Germany      | Unilateral VS                                                                                                                                                                                                                                                        | 38  | DHI                                  | Vestibular Schwannoma | Both              | Prospective   | 6  |
| Dirven 2020(10)     | Germany      | Adult (age $\geq$ 21 years) medulloblastoma patients with a Chang stage T1-4 and M0 or M1                                                                                                                                                                            | 30  | QLQ-C30,<br>QLQ-BN20                 | Medulloblastoma       | Both              | Prospective   | 60 |
| Klersy 2018(28)     | Germany      | Patients who suffered from a small unilateral VS (9.34 mm, range 1.5-23 mm) between 2013 and 2016                                                                                                                                                                    | 65  | SF-36                                | Vestibular Schwannoma | Post-intervention | Prospective   | 42 |
| Hebb 2019(29)       | Canada       | Patients of the Maritime Lateral Skull Base Clinic within the past 10 years with unilateral VS; have completed at least one QoL questionnaire booklet before or after treatment (or if conservatively managed have completed one or more QoL questionnaire booklets) | 210 | HHI, DHI, THI                        | Vestibular Schwannoma | Both              | Retrospective | NA |

|                    |                |                                                                                                                                                                                                                                                  |     |                                    |                        |                   |               |     |
|--------------------|----------------|--------------------------------------------------------------------------------------------------------------------------------------------------------------------------------------------------------------------------------------------------|-----|------------------------------------|------------------------|-------------------|---------------|-----|
| Sandooram 2010(30) | UK             | Patients referred to the unit with a new diagnosis of unilateral VS                                                                                                                                                                              | 35  | SF-36, GBI                         | Vestibular Schwannoma  | Both              | Prospective   | NA  |
| Scheich 2014(31)   | Germany        | Patients presenting with unilateral VS between 2005 and 2011                                                                                                                                                                                     | 117 | Self-Designed Questionnaire, SF-36 | Vestibular Schwannoma  | Post-intervention | Retrospective | 6   |
| Cada 2016(32)      | Czech Republic | Patients who underwent surgery for VS between 2014 and 2015                                                                                                                                                                                      | 20  | GHSI, DHI                          | Vestibular Schwannoma  | Both              | Prospective   | NA  |
| LeReste 2013(33)   | France         | Patients operated on for a haemangioblastoma between 1998 and 2010 in the neurosurgery department                                                                                                                                                | 38  | SF-36                              | Hemangioblastoma       | NA                | Retrospective | 40  |
| Morisako 2015(34)  | Japan          | Patients with benign (WHO Grade I) petroclival meningiomas who underwent microsurgical resection via a combined trans-petrosal approach at Osaka City University between January 1990 and December 2009                                          | 60  | PCMIS                              | Petroclival Meningioma | Both              | Retrospective | 149 |
| Kim 2015(35)       | Korea          | VS patients managed by MS, GKS, or observation with serial imaging between January 2012 to December 2013                                                                                                                                         | 143 | SF-36                              | Vestibular Schwannoma  | Post-intervention | Prospective   | 19  |
| Plotkin 2019(36)   | USA            | Patients aged $\geq 6$ years, clinical diagnosis of NF2, 10-12 progressive VS-associated hearing loss, baseline word recognition score (WRS) between 6% and 84% in the target ear, and at least 1 VS $\geq 0.4$ mL on volumetric analysis of MRI | 23  | NFTI-QOL                           | Vestibular Schwannoma  | Both              | Prospective   | NA  |

|                     |             |                                                                                                                                                                                |      |                             |                       |                   |               |     |
|---------------------|-------------|--------------------------------------------------------------------------------------------------------------------------------------------------------------------------------|------|-----------------------------|-----------------------|-------------------|---------------|-----|
| Tos 2003(37)        | Denmark     | Patients operated on in Denmark for a sporadic, unilateral VS during the 25-year period 1976–2000                                                                              | 1020 | Self-Designed Questionnaire | Vestibular Schwannoma | Post-intervention | Retrospective | 138 |
| Kieffer 2019(38)    | France      | Patients treated for childhood MB at Gustave Roussy, between 1989 and 2005, aged at least 18 years                                                                             | 58   | Self-Designed Questionnaire | Medulloblastoma       | Post-intervention | Retrospective | 179 |
| Combs 2013(39)      | Germany     | Patients treated for VS between 1990 and 2011 in a single institution                                                                                                          | 246  | Heidelberg SYQOL Inventory  | Vestibular Schwannoma | NA                | Retrospective | 117 |
| Ryzenman 2005(40)   | USA         | Acoustic Neuroma Association members who had VS who underwent one of the after surgical approaches: trans-labyrinthine, suboccipital/retro-sigmoid, or middle fossa approaches | 1595 | Self-Designed Questionnaire | Vestibular Schwannoma | Post-intervention | Retrospective | NA  |
| Wirsching 2020(41)  | Switzerland | Patients with histologically confirmed intracranial meningioma, treated at the University Hospital Zurich between 2000 and 2013 with a follow-up of at least 1 year            | 249  | QLQ-C30, QLQ-BN20, MDASI-BT | Meningioma            | Both              | Prospective   | 12  |
| vanLeeuwen 1996(42) | Netherlands | Unilateral VS patients presenting to University Hospital Nijmegen between 1980-1993                                                                                            | 174  | Self-Designed Questionnaire | Vestibular Schwannoma | Post-intervention | Prospective   | 84  |
| Samii 2017(43)      | Germany     | Intracanalicular VS patients in Neuroscience Institute Hanover from 2001-2013 with disabling vestibular symptoms (Grade IV Kanzaki)                                            | 38   | DHI                         | Vestibular Schwannoma | Both              | Retrospective | 12  |

|                     |         |                                                                                                                                                                                                                                                                                                              |      |                         |                       |                   |               |     |
|---------------------|---------|--------------------------------------------------------------------------------------------------------------------------------------------------------------------------------------------------------------------------------------------------------------------------------------------------------------|------|-------------------------|-----------------------|-------------------|---------------|-----|
| Chweya 2020(44)     | USA     | VS patients in Mayo Clinic or Acoustic Neuroma Association dataset                                                                                                                                                                                                                                           | 1362 | PANQOL                  | Vestibular Schwannoma | Post-intervention | Retrospective | 132 |
| Kerezoudis 2019(45) | USA     | Patients $\geq 18$ yr with primary diagnosis of sporadic VS between January 2015 and March 2017                                                                                                                                                                                                              | 1254 | PANQOL                  | Vestibular Schwannoma | Post-intervention | Retrospective | 6   |
| Yang 2018(46)       | China   | All VS patients with non-serviceable hearing (Class D according to the American Academy of Otolaryngology-Head and Neck Surgery, AAO-HNS, Foundation Classification) in the affected ear and normal hearing in the contralateral ear diagnosed in Shanghai Ninth People's Hospital from January to June 2017 | 51   | APHAB, BBS              | Vestibular Schwannoma | Post-intervention | Prospective   | 6   |
| Tveiten 2017(47)    | Norway  | Sporadic small- and medium-sized VS ( $\leq 3$ cm), evaluated at the neurosurgical and otolaryngology departments at 2 independent tertiary academic referral centres between 1998 and 2008                                                                                                                  | 400  | HHI, THI, SF-36, PANQOL | Vestibular Schwannoma | Post-intervention | Prospective   | 91  |
| Dutzmann 2013(48)   | Germany | Adult patients (18 years) with histologically proven cranial ependymomas treated between 1990 and 2009                                                                                                                                                                                                       | 64   | QLQ-C30, QLQ-BN20       | Ependymoma            | Post-intervention | Retrospective | 47  |
| Rameh 2010(49)      | France  | Patient with stages III and IV VS operated by the senior author (JM) at Nord University Hospital in Marsellie, France between 2000 and 2006                                                                                                                                                                  | 150  | SF-36                   | Vestibular Schwannoma | Post-intervention | Retrospective | 71  |

|                    |             |                                                                                                                          |     |                 |                              |                   |               |    |
|--------------------|-------------|--------------------------------------------------------------------------------------------------------------------------|-----|-----------------|------------------------------|-------------------|---------------|----|
| MacAndie 2004(50)  | UK          | VS patients presenting to Institute of Neurological Sciences in Glasgow                                                  | 100 | SF-36           | Vestibular Schwannoma        | Post-intervention | Prospective   | NA |
| Jufas 2015(51)     | Australia   | Unilateral VS patients between 1994 and 2010                                                                             | 223 | SF-36, DHI, THI | Vestibular Schwannoma        | NA                | Retrospective | 95 |
| Armstrong 2011(52) | USA         | Ependymoma or ependymoma variant patients who signed up to the CERN foundation website between 1995 and 2010             | 118 | MDASI-BT        | Ependymoma                   | NA                | Prospective   | 50 |
| Armstrong 2010(53) | USA         | Cancer diagnosis before 21 years with Initial treatment between 1970 and 1986 and minimum 5-year survival post diagnosis | 692 | SF-36           | Astrocytoma, Medulloblastoma | Post-intervention | Retrospective | NA |
| Kristin 2019(54)   | Germany     | Patients with VS tumours who underwent microsurgical resection between Jan 2007 and Jan 2017                             | 72  | PANQOL, SF-36   | Vestibular Schwannoma        | NA                | Retrospective | NA |
| Timmer 2010(55)    | Netherlands | Patients who underwent GKRS at Donders Institute for Brain, Cognition and Behaviours in Nijmegen between 2003 and 2007   | 97  | SF-36           | Vestibular Schwannoma        | Post-intervention | Retrospective | 21 |
| Myrseth 2006(56)   | Norway      | MRI diagnosis of unilateral VS at Haukeland University Hospital                                                          | 199 | SF-36, GBI      | Vestibular Schwannoma        | Post-intervention | Prospective   | NA |

|                     |           |                                                                                                                                                                                                                                                             |     |                             |                         |                   |               |    |
|---------------------|-----------|-------------------------------------------------------------------------------------------------------------------------------------------------------------------------------------------------------------------------------------------------------------|-----|-----------------------------|-------------------------|-------------------|---------------|----|
| Parving 1992(57)    | Denmark   | VS patients between 1976 and 1990                                                                                                                                                                                                                           | 293 | Self-Designed Questionnaire | Vestibular Schwannoma   | Post-intervention | Retrospective | 72 |
| Henzel 2009(58)     | Germany   | VS patients presenting from 1999 to 2005 at Philips University Marburg                                                                                                                                                                                      | 74  | SF-36                       | Vestibular Schwannoma   | Post-intervention | Retrospective | 12 |
| Broomfield 2016(59) | UK        | Non-HCP BANA members with VS                                                                                                                                                                                                                                | 598 | Self-Designed Questionnaire | Vestibular Schwannoma   | Both              | Prospective   | NA |
| Hebb 2020(60)       | Canada    | Patients with Glomus Jugulare Tumour presenting to Maritime Lateral Skull Base clinic                                                                                                                                                                       | 23  | HHI, THI and DHI            | Glomus Jugularea Tumour | Both              | Retrospective | NA |
| Lin 2009(61)        | Canada    | Complete facial paralysis after unilateral AN surgery, one of 4 types of faciula re-innervation (defect has to be amendable to repair), translabyrinthine resection approach, operated on in the University of Toronto, Canada Department of Otolaryngology | 25  | SF-36                       | Vestibular Schwannoma   | Post-intervention | Retrospective | NA |
| Glaas 2018(62)      | Germany   | VS patients undergoing microsurgical translabyrinthine surgery between 2007 and 2017 in Dusseldorf University Hospital                                                                                                                                      | 72  | PANQOL                      | Vestibular Schwannoma   | Post-intervention | Retrospective | NA |
| Brooker 2010(63)    | Australia | Unilateral VS presenting to 4 major centres in Australian states of Victoria and New South Wales between 18-75 years with ability to read and write English                                                                                                 | 180 | SF-36, GBI                  | Vestibular Schwannoma   | Post-intervention | Retrospective | 6  |



|                    |        |                                                                                                            |     |          |                       |                   |               |    |
|--------------------|--------|------------------------------------------------------------------------------------------------------------|-----|----------|-----------------------|-------------------|---------------|----|
| Lynn 1999(64)      | USA    | Adult patients (18 years) who underwent rectosigmoid removal of VS between January 1990 and September 1997 | 237 | DHI, HSQ | Vestibular Schwannoma | Post-intervention | Retrospective | 48 |
| Fahy 2002(65)      | UK     | Extracanalicular VS                                                                                        | 51  | GBI      | Vestibular Schwannoma | Post-intervention | Prospective   | 36 |
| Pan 2012(66)       | Taiwan | Large VS (>3cm) between August 2003 to October 2008                                                        | 35  | SF-36    | Vestibular Schwannoma | Both              | Retrospective | 24 |
| Ning 2019(67)      | China  | VS diagnosed after cranial CT/MRI/pathology, surgical resection                                            | 100 | SF-36    | Vestibular Schwannoma | Post-intervention | Prospective   | 1  |
| Varughese 2012(68) | Norway | De novo tumour (VS) + tumour growth in observation stage + GKRS                                            | 45  | SF-36    | Vestibular Schwannoma | Post-intervention | Prospective   | 60 |
| Martin 2001(69)    | UK     | Unilateral VS between 1992 and 1995 operated by the same team (senior authors)                             | 76  | SF-36    | Vestibular Schwannoma | Post-intervention | Prospective   | 18 |
| Turel 2015(70)     | India  | Unilateral VS between January 2009 and December 2012 at Christian Medical College, Vellore, India          | 100 | SF-36    | Vestibular Schwannoma | Both              | Prospective   | 12 |

|                    |         |                                                                                                                                                  |      |                             |                       |                   |               |    |
|--------------------|---------|--------------------------------------------------------------------------------------------------------------------------------------------------|------|-----------------------------|-----------------------|-------------------|---------------|----|
| Shaffer 2010(71)   | USA     | VS patients (>18 years) at Upenn Department of Otorhinolaryngology                                                                               | 143  | PANQOL                      | Vestibular Schwannoma | Post-intervention | Prospective   | 60 |
| Grauvogel 2010(72) | Germany | Meningioma or VS in the CPA operated on by the senior author at Albert-Ludwigs University in Freiburg Germany between October 2003 and July 2006 | 31   | Self-Designed Questionnaire | Meningioma            | Both              | Retrospective | 14 |
| Myrseth 2005(73)   | Norway  | VS patients in Haukeland University Hospital, Norway                                                                                             | 189  | GBI                         | Vestibular Schwannoma | Post-intervention | Retrospective | 69 |
| Miller 2019(74)    | USA     | Sporadic VS in Upenn Department of Otorhinolaryngology and Neurosurgery, >18 years with MRI imaging available and >1 audiometric visit           | 123  | PANQOL                      | Vestibular Schwannoma | Post-intervention | Retrospective | 50 |
| Breivik 2013(75)   | Norway  | MRI diagnosis of unilateral VS at Haukeland University Hospital between 2000 and 2009                                                            | 237  | SF-36                       | Vestibular Schwannoma | Post-intervention | Retrospective | 55 |
| DiMaio 2009(76)    | Canada  | Unilateral VS in British Columbia, Canada diagnosed on MRI or CT                                                                                 | 205  | SF-36                       | Vestibular Schwannoma | Both              | Prospective   | 32 |
| Prummer 2019(77)   | USA     | Adult patients (>18 years) with primary diagnosis of sporadic VS between January 2015 and March 2017                                             | 1060 | PANQOL                      | Vestibular Schwannoma | Post-intervention | Prospective   | 46 |

|                    |              |                                                                                                                                              |      |                                     |                       |                   |               |    |
|--------------------|--------------|----------------------------------------------------------------------------------------------------------------------------------------------|------|-------------------------------------|-----------------------|-------------------|---------------|----|
| Carlson 2015(78)   | Norway + USA | Sporadic VS smaller than 3cm, underwent microsurgery, observation or stereotactic radiosurgery                                               | 642  | SF-36, PROMIS010, GBI, PANQOL       | Vestibular Schwannoma | Post-intervention | Prospective   | NA |
| Carlson 2018(79)   | USA          | Adults (>18 years) with sporadic VS                                                                                                          | 1288 | PANQOL                              | Vestibular Schwannoma | Post-intervention | Retrospective | NA |
| Pollock 2006(80)   | USA          | Unilateral VS (less than 3cm) between June 2000 to July 2002                                                                                 | 82   | HSQ, DHI                            | Vestibular Schwannoma | Both              | Prospective   | 42 |
| Nishiyama 2020(81) | Japan        | VS patients                                                                                                                                  | 72   | PANQOL, SF-36, THI, DHI, HADS, FaCE | Vestibular Schwannoma | Post-intervention | Prospective   | NA |
| Berkowitz 2017(82) | USA          | Participants who underwent Gamma Knife ® radiosurgery, between 1997 and 2007, after the integration of MRI for treatment planning            | 353  | SF-36                               | Vestibular Schwannoma | Post-intervention | Retrospective | NA |
| Oddon 2017(83)     | France       | Patients with sporadic unilateral VS who are first managed by "wait-and-scan" strategy with repeated MRI (at least two MRI six months apart) | 26   | SF-36, PANQOL                       | Vestibular Schwannoma | Post-intervention | Retrospective | 72 |
| Deberge 2018(84)   | France       | VS stage 1 and 2                                                                                                                             | 142  | SF-36, THI, HHI, DHI                | Vestibular Schwannoma | NA                | Retrospective | NA |

|                   |                |                                                                           |     |               |                       |                   |                               |     |
|-------------------|----------------|---------------------------------------------------------------------------|-----|---------------|-----------------------|-------------------|-------------------------------|-----|
| Breivik 2012(85)  | Norway         | Conservatively treated VS                                                 | 193 | SF-36, GBI    | Vestibular Schwannoma | Post-intervention | Prospective                   | 46  |
| Wangerid 2014(86) | Sweden         | VS patients treated at the Karolinksa university from 1997 to 2003        | 128 | SF-36         | Vestibular Schwannoma | Post-intervention | Retrospective and Prospective | 104 |
| Vogel 2008(87)    | Netherlands    | Patients with newly diagnosed VS between January and October 2005         | 90  | SF-36, IPQ-R  | Vestibular Schwannoma | Post-intervention | Prospective                   | NA  |
| Medina 2017(88)   | Spain          | Adults (>18 years) with untreated VS diagnosed in the previous 12 months  | 30  | SF-12, PANQOL | Vestibular Schwannoma | Post-intervention | Prospective                   | NA  |
| DelRio 2012(89)   | Spain          | Patients with NF-2 who were followed up for at least 1 year               | 71  | GBI           | Vestibular Schwannoma | Post-intervention | Retrospective                 | NA  |
| Stavas 2014(90)   | USA            | All VS patients that underwent linear accelerator-based SRS               | 10  | DHI           | Vestibular Schwannoma | Both              | Prospective                   | 13  |
| Hruba 2019(91)    | Czech Republic | VS patients who underwent the retro-sigmoid vestibular schwannoma removal | 52  | ABC           | Vestibular Schwannoma | Post-intervention | Retrospective                 | NA  |

|                     |             |                                                                                                                 |     |                          |                                                                             |                   |               |    |
|---------------------|-------------|-----------------------------------------------------------------------------------------------------------------|-----|--------------------------|-----------------------------------------------------------------------------|-------------------|---------------|----|
| Kelleher 2002(92)   | UK          | All patients that entered into hospital database over the 3-year period to May 1999                             | 70  | SF-36                    | Vestibular Schwannoma, Meningioma, Hemangioblastoma, Hypoglossal Schwannoma | Post-intervention | Prospective   | 3  |
| Cheng 2009(93)      | Australia   | Patients surgically treated for VS At the Base of Skull Surgery Unit at Westmead Hospital between 1999 and 2007 | 121 | SF-36                    | Vestibular Schwannoma                                                       | Post-intervention | Prospective   | 6  |
| Nicoucar 2006(94)   | Switzerland | Patients with grade III or IV VS tumours between 1982 and 2001                                                  | 103 | SF-36                    | Vestibular Schwannoma                                                       | Post-intervention | Retrospective | NA |
| Ribeyre 2016(95)    | France      | Patients scheduled for VS tumour removal                                                                        | 26  | IPQ-R, HADS, WHOQOL-Bref | Vestibular Schwannoma                                                       | Both              | Prospective   | NA |
| vanLeeuwen 2015(96) | USA         | Diagnosed with VS between April 2011 and October 2012                                                           | 253 | IPQ-R, PANQOL            | Vestibular Schwannoma                                                       | NA                | Retrospective | NA |
| Lassaletta 2006(97) | Spain       | Patients with unilateral VS                                                                                     | 95  | GBI                      | Vestibular Schwannoma                                                       | Post-intervention | Retrospective | 12 |
| Iyer 2010(98)       | New Zealand | Patients who underwent surgery for VS between 1998 and 2004                                                     | 104 | SF-36, GBI               | Vestibular Schwannoma                                                       | Post-intervention | Retrospective | NA |

|                      |           |                                                                                                                                                                                                      |     |                      |                       |                   |               |     |
|----------------------|-----------|------------------------------------------------------------------------------------------------------------------------------------------------------------------------------------------------------|-----|----------------------|-----------------------|-------------------|---------------|-----|
| Myrseth 2009(99)     | Norway    | Patients (aged 20 and over) harbouring a unilateral de novo non-NF2 VS with a maximum diameter of 25 mm or less in the CPA                                                                           | 88  | SF-36                | Vestibular Schwannoma | Post-intervention | Prospective   | 24  |
| Lee 2007(100)        | USA       | Patients who underwent surgery for VS at London Health Sciences Centre between January 1996 and December 2000, English-speaking and no previous facial abnormality from causes other than VS surgery | 56  | FaCE                 | Vestibular Schwannoma | Post-intervention | Retrospective | 39  |
| Sandooram 2004(101)  | UK        | Unilateral VS who had presented or been referred to a large teaching hospital between 1985 and 2001                                                                                                  | 165 | SF-36                | Vestibular Schwannoma | Post-intervention | Retrospective | 138 |
| Presutti 2014(102)   | Italy     | Patients older than 18 years of age, treated through a retro-sigmoid approach with a combined microscopic and endoscopic technique                                                                   | 81  | GHSI, SF-36          | Vestibular Schwannoma | Post-intervention | Retrospective | NA  |
| Lloyd 2010(103)      | USA       | The main criteria for entering a program of conservative management was a tumor not significantly compressing the brainstem. There were no restrictions regarding age.                               | 171 | SF-36, THI, HHI, DHI | Vestibular Schwannoma | Post-intervention | Retrospective | 68  |
| daCruz 2000(104)     | Australia | Patients with VS who had undergone surgery using the translabyrinthine or retro-sigmoid approach at Addenbrooke's Hospital                                                                           | 90  | SF-36                | Vestibular Schwannoma | Post-intervention | Retrospective | 18  |
| Broomfield 2017(105) | USA       | VS patients who were managed between 1978 and 2009                                                                                                                                                   | 500 | SF-36                | Vestibular Schwannoma | Post-intervention | Retrospective | 60  |

|                      |             |                                                                                                                                                                                                                                                                                                                                   |     |               |                                          |                   |               |     |
|----------------------|-------------|-----------------------------------------------------------------------------------------------------------------------------------------------------------------------------------------------------------------------------------------------------------------------------------------------------------------------------------|-----|---------------|------------------------------------------|-------------------|---------------|-----|
| Godefroy 2009(106)   | Netherlands | VS patients                                                                                                                                                                                                                                                                                                                       | 41  | SF-36         | Vestibular Schwannoma                    | Post-intervention | Prospective   | 47  |
| Foley 2017(107)      | USA         | Patients with VS who attended the Skull-Base clinic between September 2014 and June 2015                                                                                                                                                                                                                                          | 83  | FACT-Br       | Vestibular Schwannoma                    | Post-intervention | Retrospective | 59  |
| vanLeeuwen 2014(108) | USA         | Patients diagnosed with VS in the Leiden University Medical Center                                                                                                                                                                                                                                                                | 178 | SF-36, PANQOL | Vestibular Schwannoma                    | Pre-intervention  | Prospective   | NA  |
| Scholtes 2019(109)   | Germany     | Primary International Classification of Childhood Cancer 3 (ICCC-3) diagnosis at an age <15 years, as up to the reporting date, the German Childhood Cancer Registry (GCCR) only registered patients up to this age; residency in Germany at the time of diagnosis; follow-up >5 years and age at survey between 25 and 45 years. | 270 | QLQ-C30       | Astrocytoma, Ependymoma, Medulloblastoma | Post-intervention | Retrospective | 263 |
| Godefroy 2007(110)   | Netherlands | VS patients who had been operated between January 2001 and May 2005 for rotatory vertigo, small non-cystic intracanalicular tumours (with no extra-meatal growth) and experienced disequilibrium with rotatory vertigo or had multiple attacks of vertigo with dizziness                                                          | 17  | SF-36, DHI    | Vestibular Schwannoma                    | Post-intervention | Prospective   | NA  |
| Pintea 2018(111)     | Germany     | Patients with petroclival and lateral posterior surface of pyramid meningiomas treated surgically between 1991 and 2007                                                                                                                                                                                                           | 78  | SF-36         | Meningioma                               | Post-intervention | Retrospective | 59  |

|                      |              |                                                                                                                          |      |                      |                       |                   |               |    |
|----------------------|--------------|--------------------------------------------------------------------------------------------------------------------------|------|----------------------|-----------------------|-------------------|---------------|----|
| Park 2011(112)       | USA          | VS patients treated from December 2006 to November 2008                                                                  | 59   | SF-36, THI, HHI, DHI | Vestibular Schwannoma | Post-intervention | Prospective   | 15 |
| vanLeeuwen 2013(113) | USA          | Patients with VS that was confirmed by radiologic examination                                                            | 155  | PANQOL               | Vestibular Schwannoma | Post-intervention | Retrospective | NA |
| Dhayalan 2019(114)   | Norway + USA | VS patients who took part in educational course during 2014 and 2015                                                     | 137  | PANQOL, HADS         | Vestibular Schwannoma | Post-intervention | Prospective   | NA |
| Carlson 2015(115)    | USA          | Adult (18 years) patients with previously untreated small- to medium-sized VS that were evaluated between 1998 and 2008  | 538  | SF-36, PANQOL        | Vestibular Schwannoma | Post-intervention | Retrospective | 92 |
| Soulier 2017(116)    | Netherlands  | Unilateral VS, started treatment consisting of observation, RT, or MS in the period from January 2004 until January 2014 | 1228 | PANQOL               | Vestibular Schwannoma | Post-intervention | Retrospective | 54 |
| Betchen 2003(117)    | USA          | VS patients who had undergone resection performed by a single neurosurgeon at Mt Sinai Hospital                          | 135  | SF-36                | Vestibular Schwannoma | Post-intervention | Retrospective | 6  |
| Tufarelli 2006(118)  | USA          | VS patients who underwent surgery                                                                                        | 459  | SF-36, DHI           | Vestibular Schwannoma | Post-intervention | Retrospective | 48 |



|                           |         |                                                                                                                                                                                 |     |            |                         |                   |               |     |
|---------------------------|---------|---------------------------------------------------------------------------------------------------------------------------------------------------------------------------------|-----|------------|-------------------------|-------------------|---------------|-----|
| Robinett<br>2014(119)     | USA     | Patients that received their care at study facility, at least 18 years old and had a diagnosis of unilateral VS                                                                 | 294 | PANQOL     | Vestibular Schwannoma   | Post-intervention | Retrospective | 95  |
| Nikolopoulos<br>1998(120) | Italy   | Patient surgically treated for VS tumours                                                                                                                                       | 459 | SF-36, DHI | Vestibular Schwannoma   | Post-intervention | Retrospective | 48  |
| Baumann<br>2005(121)      | Germany | Patients who underwent VS surgery via middle cranial fossa approach from Sep 1997 to Dec 2001 at the Department of Otolaryngology, Head & Neck Surgery, University of Tu'bingen | 42  | SF-36      | Vestibular Schwannoma   | Post-intervention | Prospective   | 3   |
| Al-Shudifat<br>2016(122)  | Sweden  | VS surgery between 2000 to 2010 at Lungd University Hospital in Sweden                                                                                                          | 140 | EQ-5D      | Vestibular Schwannoma   | Post-intervention | Retrospective | 164 |
| Riffaud 2009(123)         | France  | MB patients (>16 years) treated at Eugene Marquis Cancer Institute, Rennes, France                                                                                              | 27  | SF-36      | Medulloblastoma         | Post-intervention | Retrospective | 104 |
| Miller 2019(124)          | USA     | Patients diagnosed with sporadic VS                                                                                                                                             | 364 | PANQOL     | Vestibular Schwannoma   | Post-intervention | Retrospective | 43  |
| Henzel 2007(125)          | Germany | Patients treated for GJT                                                                                                                                                        | 17  | SF-36      | Glomus Jugularea Tumour | Post-intervention | Retrospective | 40  |

|              |        |                                                                                                        |    |     |                       |      |             |    |
|--------------|--------|--------------------------------------------------------------------------------------------------------|----|-----|-----------------------|------|-------------|----|
| Thomeer 2015 | France | VS patients operated on via transpetrosal approaches between 2010 and 2011 in tertiary referral center | 48 | DHI | Vestibular Schwannoma | Both | Prospective | NA |
|--------------|--------|--------------------------------------------------------------------------------------------------------|----|-----|-----------------------|------|-------------|----|
